# Supplementary material for: Controlled synthesis and tunable luminescence of uniform YPO4·0.8H2O and YPO4·0.8H2O : Tb3+/Eu3+ nanocrystals by a facile approach
Source: Royal Society of Chemistry journal article supplement (doi:10.1039/c4tc01427h), 2014-01-01
Supplement: c4tc01427h1.pdf [file c4tc01427h1.pdf]

## Controlled synthesis and tunable luminescence of uniform

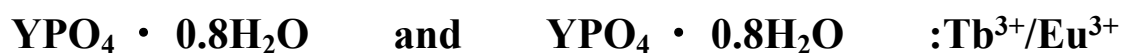

## nanocrystals by a facile approach

Lei Zhang<sup>a</sup>, Linlin Fu<sup>a</sup>, Xingxing Yang<sup>a</sup>, Zuoling Fu<sup>a,\*</sup>, Xiangdong Qi<sup>c</sup>, Zhijian Wu<sup>b</sup>

<sup>a</sup> State Key Laboratory of Super-hard Materials, College of Physics, Jilin University, Changchun 130012, China

<sup>b</sup> State Key Laboratory of Rare Earth Resources Utilization, Changchun Institute of Applied Chemistry, Chinese Academy of Sciences, Changchun 130022, China

<sup>c</sup> Changchun Institute of Optics, Fine Mechanics and Physics, Chinese Academy of Sciences, Changchun 130033, China

E-mail: [zlfu@jlu.edu.cn](mailto:zlfu@jlu.edu.cn) (Z. L. Fu)

Telephone: 86-431-85167966

Fax: 86-431-85167966

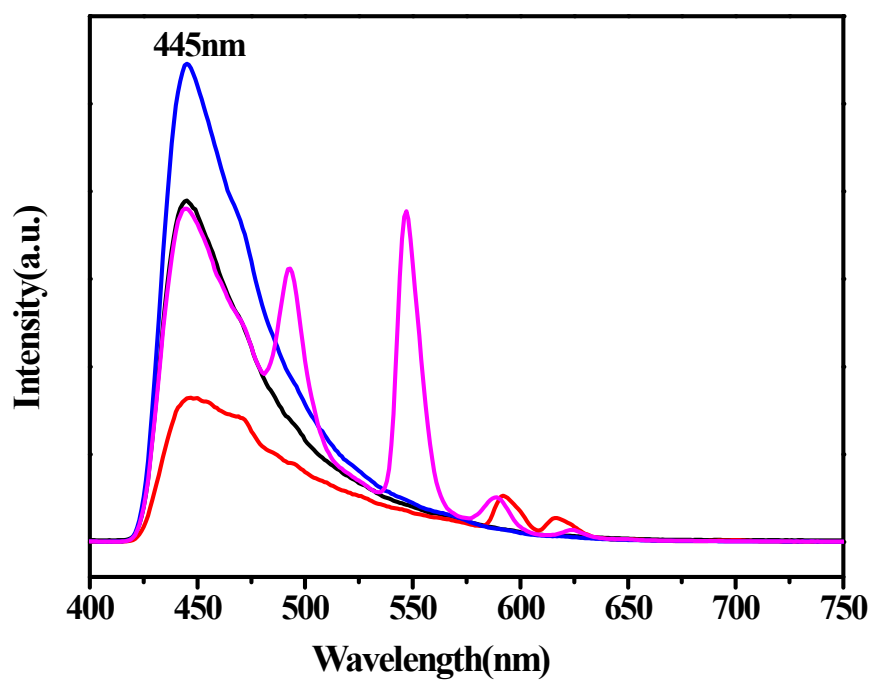

**Figure S1:** The emission spectra of the YPO<sub>4</sub> · 0.8H<sub>2</sub>O (black line), YPO<sub>4</sub> · 0.8H<sub>2</sub>O: 0.04Eu<sup>3+</sup> (red line), YPO<sub>4</sub> · 0.8H<sub>2</sub>O:0.04La<sup>3+</sup> (blue line) and YPO<sub>4</sub> · 0.8H<sub>2</sub>O: 0.04Tb<sup>3+</sup> (magenta line) under the excitation at 380nm.
